# Supplementary material
Source: Springer Nature journal article supplement (https://www.springermedizin.de/resource/supplementary/13051_2009_27_MOESM3_ESM.pdf/9669788)

**CD24**

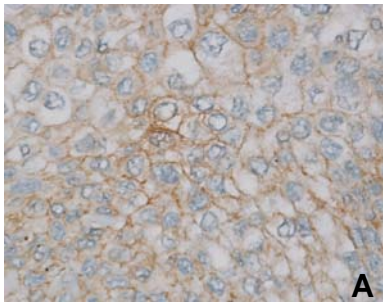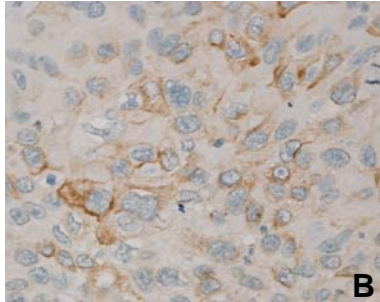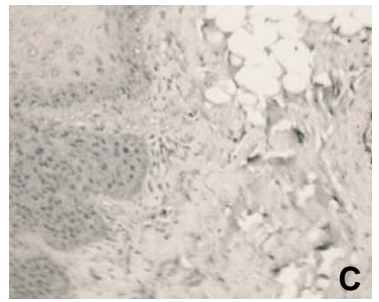

**CD44**

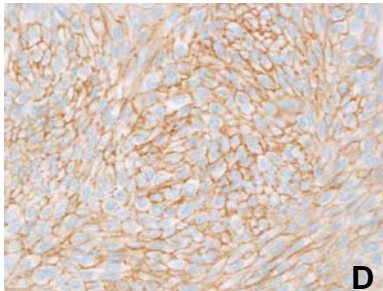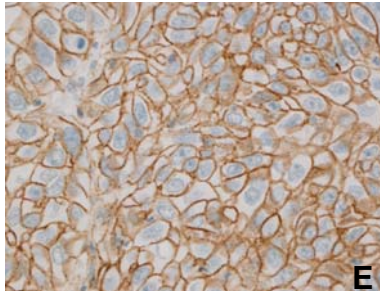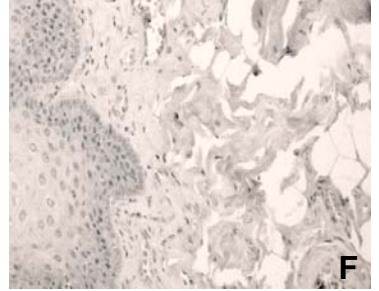

**CD74**

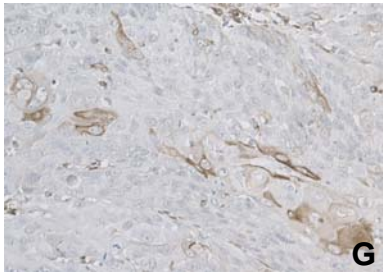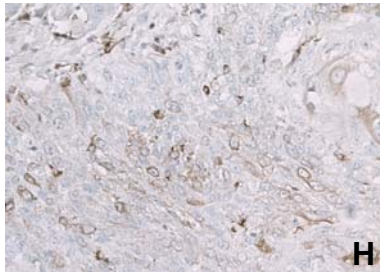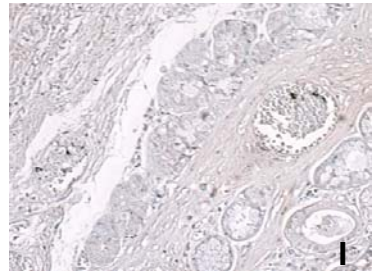

**FABP5**

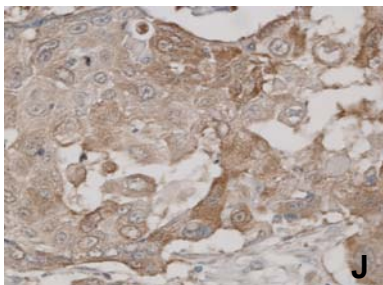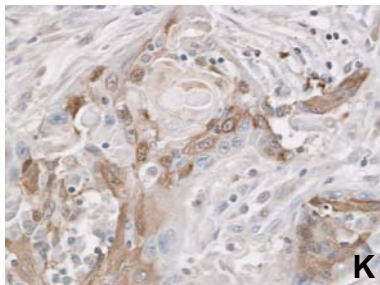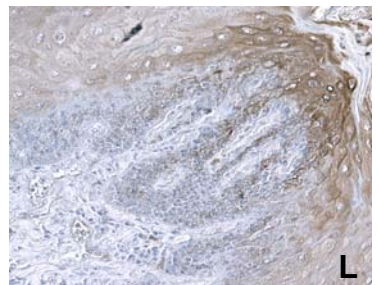

**Hsp27**

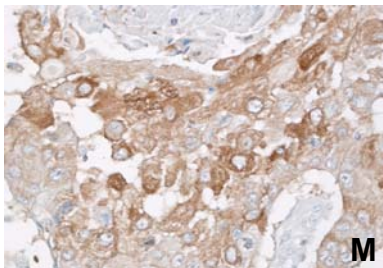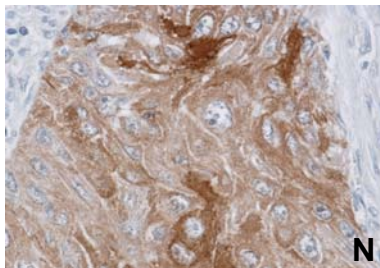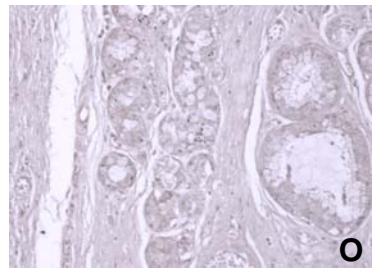

Supplement: MOESM3 [file 9669788]
